# Supplementary material
Source: Research Square preprint supplement (doi:10.21203/rs.3.rs-9014176/v1)
Supplement: Supplementary file 1 [file 4a5a281d2e7ad8b175a3c3e4.docx]

**Supplementary materials**

*Table 9. Distribution of CRIES-13 self-report*

| **Scale** | **Skewness** | **Z-value** | **Kurtosis** | **Z-value** |
| --- | --- | --- | --- | --- |
| CRIES-13 Self-report |
| Total | .201 | 0.579 | -.762 | 1.119 |
| Intrusion | .533 | 1.536 | -.685 | 1.006 |
| Avoidance | -.017 | 0.049 | -1.487 | 2.184 |
| Arousal | .466 | 1.343 | -.350 | 0.514 |

* std. error is .347

** std. error is .681

*Table 10. Distribution of CRIES-13 parent-report*

| **Scale** | **Skewness** | **Z-value** | **Kurtosis** | **Z-value** |
| --- | --- | --- | --- | --- |
| CRIES-13 Parent-report |
| Total | -.083 | 0.275 | -1.039 | 1.746 |
| Intrusion | .535 | 1.772 | -.661 | 1.111 |
| Avoidance | .361 | 1.195 | -.944 | 1.587 |
| Arousal | .394 | 1.305 | -.730 | 1.227 |

* std. error is .302

** std. error is .595

*Table 11. Distribution of SDQ self-report*

| **Scale** | **Skewness*** | **Z-value** | **Kurtosis**** | **Z-value** |
| --- | --- | --- | --- | --- |
| SDQ Self-report |
| Total | 1.028 | 2.997 | .505 | .749 |
| Internalizing | .968 | 2.875 | .467 | .693 |
| Externalizing | .824 | 2.402 | .066 | .098 |
| Emotional symptoms | .837 | 2.440 | -.073 | .108 |
| Conduct problems | .783 | 2.283 | -.469 | .696 |
| Hyperactivity/inattention | .406 | 1.184 | -.602 | .893 |
| Peer problems | .407 | 1.187 | -.039 | .058 |
| Prosocial behaviour | -1.333 | -3.886 | 1.519 | 2.254 |

* std. error is .343

** std. error is .674

*Table 12. Distribution of SDQ parent-report*

| **Scale** | **Skewness*** | **Z-value** | **Kurtosis**** | **Z-value** |
| --- | --- | --- | --- | --- |
| SDQ Parent-report |
| Total | .626 | 2.073 | -.267 | .449 |
| Internalizing | .639 | 2.116 | -.189 | 0.318 |
| Externalizing | .561 | 1.858 | -.552 | 0.928 |
| Emotional symptoms | .410 | 1.358 | -.937 | 1.575 |
| Conduct problems | 1.153 | 3.818 | 1.801 | 3.027 |
| Hyperactivity/inattention | .437 | 1.447 | -.638 | 1.072 |
| Peer problems | 1.030 | 3.411 | 1.194 | 2.007 |
| Prosocial behaviour | -1.290 | 4.272 | 1.533 | 2.576 |

* std. error is .302

** std. error is .595

*Table 13. Inter-item correlation matrix CRIES-13 Self-report*

| tem | 1 | 2 | 3 | 4 | 5 | 6 | 7 | 8 | 9 | 10 | 11 | 12 | 13 | Total |
| --- | --- | --- | --- | --- | --- | --- | --- | --- | --- | --- | --- | --- | --- | --- |
| 1a | - |  |  |  |  |  |  |  |  |  |  |  |  | .72 |
| 2b | .44 | - |  |  |  |  |  |  |  |  |  |  |  | .54 |
| 3c | .42 | .21 | - |  |  |  |  |  |  |  |  |  |  | .60 |
| 4a | .68 | .31 | .55 | - |  |  |  |  |  |  |  |  |  | .68 |
| 5c | .52 | .45 | .54 | .67 | - |  |  |  |  |  |  |  |  | .71 |
| 6b | .38 | .52 | .37 | .50 | .61 | - |  |  |  |  |  |  |  | .62 |
| 7b | .26 | .73** | .43 | .30 | .48 | .47 | - |  |  |  |  |  |  | .49 |
| 8a | .60 | .35 | .36 | .53 | .54 | .56 | .23 | - |  |  |  |  |  | .65 |
| 9a | .45 | -.04* | .26 | .36 | .21 | .24 | -.12* | .41 | - |  |  |  |  | .34 |
| 10b | .52 | .67 | .41 | .33 | .32 | .37 | .43 | .46 | .23 | - |  |  |  | .60 |
| 11c | .55 | .09* | .59 | .51 | .44 | .22 | .35 | .43 | .20 | .24 | - |  |  | .52 |
| 12c | .12* | .11* | -.01* | .05* | .18* | -.02* | .05* | .05* | .03* | .14* | .12* | - |  | .13* |
| 13c | .34 | .07 | .40 | .29 | .27 | .33 | .04* | .32 | .40 | .37 | .29 | .22c | - | .43 |

a. intrusion items

b. avoidance items

c. arousal items

*Correlation below .20 indicating items are not correlated

**correlation above .70 indicating items are correlated to a great extent and the items may be repetitive in nature

*Table 14. Inter-item correlation Matrix CRIES-13 Parent-report*

| Item | 1 | 2 | 3 | 4 | 5 | 6 | 7 | 8 | 9 | 10 | 11 | 12 | 13 | Total |
| --- | --- | --- | --- | --- | --- | --- | --- | --- | --- | --- | --- | --- | --- | --- |
| 1a |  |  |  |  |  |  |  |  |  |  |  |  |  | .46 |
| 2b | .22 | - |  |  |  |  |  |  |  |  |  |  |  | .29* |
| 3c | .03* | .04* | - |  |  |  |  |  |  |  |  |  |  | .33 |
| 4a | .37 | -.05* | .40 | - |  |  |  |  |  |  |  |  |  | .62 |
| 5c | .49 | .24 | .30 | .50 | - |  |  |  |  |  |  |  |  | .64 |
| 6b | .26 | .60 | .10* | .16* | .42 | - |  |  |  |  |  |  |  | .54 |
| 7b | .05* | .51 | -.07* | .17* | .15* | .56 | - |  |  |  |  |  |  | .35 |
| 8a | .48 | -.08* | .14* | .39 | .35 | .20 | .03* | - |  |  |  |  |  | .47 |
| 9a | .40 | -.15* | .23 | .51 | .35 | .12* | -.03* | .46 | - |  |  |  |  | .42 |
| 10b | .24 | .50 | .17* | .26 | .30 | .60 | .51 | .16* | .00* | - |  |  |  | .53 |
| 11c | .23 | .16* | .39c | .62 | .54 | .29 | .12* | .25 | .38 | .31 | - |  |  | .55 |
| 12c | .10* | .02* | .31c | .42 | .34c | .09* | .12* | .33 | .22 | .23 | .20 | - |  | .36 |
| 13c | .35 | -.06* | .22c | .46 | .32c | .16* | .15* | .55 | .43 | .20 | .29 | .15 | - | .47 |

a. intrusion items

b. avoidance items

c. arousal items

*Correlation below sufficient values

**correlation above sufficient values

*Table 15. Inter-item correlation matrix SDQ self-report*

|  | 1 | 2 | 3 | 4 | 5 | 6 | 7 | 8 | 9 | 10 | 11 | 12 | 13 | 14 | 15 | 16 | 17 | 18 | 19 | 20 | 21 | 22 | 23 | 24 | 25 | Total |
| --- | --- | --- | --- | --- | --- | --- | --- | --- | --- | --- | --- | --- | --- | --- | --- | --- | --- | --- | --- | --- | --- | --- | --- | --- | --- | --- |
| 1e | - |  |  |  |  |  |  |  |  |  |  |  |  |  |  |  |  |  |  |  |  |  |  |  |  | .13 |
| 2c | .18* | - |  |  |  |  |  |  |  |  |  |  |  |  |  |  |  |  |  |  |  |  |  |  |  | .15* |
| 3a | -.10* | -.00* | - |  |  |  |  |  |  |  |  |  |  |  |  |  |  |  |  |  |  |  |  |  |  | .42 |
| 4e | -.13* | -.08* | -.04* | - |  |  |  |  |  |  |  |  |  |  |  |  |  |  |  |  |  |  |  |  |  | -.48 |
| 5b | .00* | .17* | .38 | -.47 | - |  |  |  |  |  |  |  |  |  |  |  |  |  |  |  |  |  |  |  |  | .70 |
| 6d | .24 | -.03* | .25 | -.18* | .30 | - |  |  |  |  |  |  |  |  |  |  |  |  |  |  |  |  |  |  |  | .48 |
| 7b | -.30 | -.20 | -.12* | -.10* | .30 | .04* | - |  |  |  |  |  |  |  |  |  |  |  |  |  |  |  |  |  |  | .14* |
| 8a | .23 | .21 | .50 | -.44 | .59 | .46 | -.07* | - |  |  |  |  |  |  |  |  |  |  |  |  |  |  |  |  |  | .64 |
| 9e | .23 | .27 | -.15* | .46 | -.27 | -.13* | -.02* | -.14* | - |  |  |  |  |  |  |  |  |  |  |  |  |  |  |  |  | -.08 |
| 10c | .14* | .12* | .16* | -.16* | .50 | .16* | .19 | .29 | -.04* | - |  |  |  |  |  |  |  |  |  |  |  |  |  |  |  | .43 |
| 11d | -.12* | -.02* | .17* | -.29 | .31 | .07* | .04* | .31 | -.12* | .23 | - |  |  |  |  |  |  |  |  |  |  |  |  |  |  | .28* |
| 12b | -.12* | .01* | .01* | -.37 | .14* | -.02* | .15* | .08* | -.10* | -.07* | .08* | - |  |  |  |  |  |  |  |  |  |  |  |  |  | .06* |
| 13a | .22 | .14* | .34 | -.57 | .53 | .48 | .05* | .67 | -.19* | .14* | .30 | .24 | - |  |  |  |  |  |  |  |  |  |  |  |  | .62 |
| 14d | -.07* | .21 | .08* | -.43 | .35 | .19* | .28 | .29 | -.11* | .21 | .35 | .33 | .38 | - |  |  |  |  |  |  |  |  |  |  |  | .40 |
| 15c | .17* | .18* | .38 | -.24 | .66 | .54 | .11* | .47 | -.03* | .44 | .33 | .13* | .52 | .35 | - |  |  |  |  |  |  |  |  |  |  | .73** |
| 16a | .00* | .11* | .22 | -.29 | .52 | .31 | .46 | .32 | .17* | .17* | .25 | .15* | .43 | .27 | .56 | - |  |  |  |  |  |  |  |  |  | .63 |
| 17e | .23 | -.02* | -.10* | .38 | -.13* | .04* | -.12* | -.09* | .28 | -.05* | -.26 | -.65 | -.20 | -.31 | -.11* | -.07* | - |  |  |  |  |  |  |  |  | -.17 |
| 18b | -.09* | .02* | .31 | -.46 | .47 | .17* | .12* | .22 | -.38 | .18* | .20 | .16* | .39 | .39 | .45 | .49 | -.42 | - |  |  |  |  |  |  |  | .43 |
| 19d | .01* | .14* | .29 | -.34 | .24 | .22 | .09* | .33 | .17* | .11* | .19* | .44 | .38 | .28 | .22 | .54 | -.34 | .34 | - |  |  |  |  |  |  | .43 |
| 20e | .15* | -.07* | .06* | .30 | -.19* | -.11* | -.26 | -.13* | .10* | .13* | -.11* | -.72 | -.28 | -.49 | -.17* | -.14* | .69 | -.21 | -.34 | - |  |  |  |  |  | -.20 |
| 21c | .17* | .16* | .19* | -.60 | .28 | .34 | .11* | .47 | -.23 | .19* | .31 | .22 | .45 | .43 | .30 | .34 | -.33 | .33 | .37 | -.26 | - |  |  |  |  | .45 |
| 22b | -.31 | -.07* | -.04* | -.08* | -.05* | .03* | .36 | -.01* | -.16* | -.11* | -.01* | .29 | .01* | .05* | -.06* | .05* | -.54 | .08* | .25 | -.43 | .10* | - |  |  |  | -.10* |
| 23d | .10* | .19* | .09* | .66 | .21 | .09* | .10* | .13* | .07* | .16* | -.21 | -.08* | .07* | -.01* | .19* | -.02* | .14* | -.08* | -.17* | .03* | -.04* | -.03* | - |  |  | .12* |
| 24a | -.06* | -.18* | .55 | -.15* | .49 | .35 | .06* | .37 | -.27 | .28 | .17* | -.06* | .36 | .12* | .33 | .43 | .05* | .39 | .38 | .16* | .13* | -.10* | -.07* | - |  | .44 |
| 25c | .11* | -.19* | .02* | -.49 | .17* | .12* | .26 | .04* | -.16* | .11* | .16* | .22 | .20 | .31 | .14* | .23 | -.42 | .50 | .11* | -.26 | .36 | -.02* | .02* | -.04* | - | .16* |

a. emotional problems items

b. conduct problems items

c. hyperactivity items

d. peer problems items

e. prosocial items

*Correlation below sufficient values

**correlation above sufficient values

*Table 16. Inter-item correlation matrix SDQ Parent-report*

| Item | 1 | 2 | 3 | 4 | 5 | 6 | 7 | 8 | 9 | 10 | 11 | 12 | 13 | 14 | 15 | 16 | 17 | 18 | 19 | 20 | 21 | 22 | 23 | 24 | 25 | Total |
| --- | --- | --- | --- | --- | --- | --- | --- | --- | --- | --- | --- | --- | --- | --- | --- | --- | --- | --- | --- | --- | --- | --- | --- | --- | --- | --- |
| 1e | - |  |  |  |  |  |  |  |  |  |  |  |  |  |  |  |  |  |  |  |  |  |  |  |  | -.22 |
| 2c | .00* | - |  |  |  |  |  |  |  |  |  |  |  |  |  |  |  |  |  |  |  |  |  |  |  | .36 |
| 3a | -.35 | -.10* | - |  |  |  |  |  |  |  |  |  |  |  |  |  |  |  |  |  |  |  |  |  |  | .40 |
| 4e | .36 | -.03* | -.25 | - |  |  |  |  |  |  |  |  |  |  |  |  |  |  |  |  |  |  |  |  |  | -.34 |
| 5b | -.16* | .25 | .29 | -.25 | - |  |  |  |  |  |  |  |  |  |  |  |  |  |  |  |  |  |  |  |  | .62 |
| 6d | -.23 | .10* | .36 | -.35 | .41 | - |  |  |  |  |  |  |  |  |  |  |  |  |  |  |  |  |  |  |  | .48 |
| 7b | -.38 | .12* | .23 | -.51 | .22 | .31 | - |  |  |  |  |  |  |  |  |  |  |  |  |  |  |  |  |  |  | .32 |
| 8a | -.31 | .14* | .43 | -.41 | .58 | .37 | .34 | - |  |  |  |  |  |  |  |  |  |  |  |  |  |  |  |  |  | .62 |
| 9e | .52 | -.18* | -.26 | .52 | -.31 | -.26 | -.55 | -.33 | - |  |  |  |  |  |  |  |  |  |  |  |  |  |  |  |  | -.45 |
| 10c | .11* | .51 | .06* | -.02* | .36 | .18* | .08* | .20 | .06* | - |  |  |  |  |  |  |  |  |  |  |  |  |  |  |  | .39 |
| 11d | -.17* | .06* | .43 | -.06* | .01* | .28 | .04* | -.01* | -.28 | .08* | - |  |  |  |  |  |  |  |  |  |  |  |  |  |  | .12* |
| 12b | -.33 | .25 | .32 | -.52 | .31 | .36 | .39 | .60 | -.42 | .06* | .02* | - |  |  |  |  |  |  |  |  |  |  |  |  |  | .39 |
| 13a | -.26 | .12* | .49 | -.45 | .56 | .49 | .22 | .72 | -.30 | .27 | .08* | .51 | - |  |  |  |  |  |  |  |  |  |  |  |  | .63 |
| 14d | -.30 | .14* | .38 | -.44 | .29 | .50 | .33 | .38 | -.53 | .05* | .34 | .45 | .46 | - |  |  |  |  |  |  |  |  |  |  |  | .47 |
| 15c | -.30 | .23 | .24 | -.15* | .48 | .33 | .41 | .43 | -.41 | .07* | .08* | .20 | .37 | .37 | - |  |  |  |  |  |  |  |  |  |  | .58 |
| 16a | -.28 | .11* | .46 | -.22 | .60 | .40 | .31 | .59 | -.39 | .18* | .04* | .32 | .57 | .42 | .68 | - |  |  |  |  |  |  |  |  |  | .69 |
| 17e | .34 | -.09* | -.42 | .41 | -.08* | -.18* | -.46 | -.37 | .52 | -.01* | -.19* | -.47 | -.28 | -.51 | -.28 | -.30 | - |  |  |  |  |  |  |  |  | -.37 |
| 18b | -.24 | .21 | .24 | -.36 | .20 | .24 | .51 | .43 | -.40 | .12* | -.00* | .42 | .27 | .31 | .26 | .33 | -.41 | - |  |  |  |  |  |  |  | .38 |
| 19d | -.18* | .25 | .34 | -.18* | .19* | .19* | .37 | .41 | -.42 | .17* | .13* | .25 | .33 | .53 | .47 | .54 | -.43 | .47 | - |  |  |  |  |  |  | .56 |
| 20e | .58 | -.14* | -.32 | .66 | -.21 | -.43 | -.61 | -.37 | .57 | -.02* | -.15* | -.49 | -.40 | -.60 | -.39 | -.36 | .56 | -.44 | -.30 | - |  |  |  |  |  | -.42 |
| 21c | -.35 | .31 | .21 | -.13* | .44 | .32 | .44 | .36 | -.46 | .08* | .10* | .36 | .32 | .46 | .57 | .51 | -.33 | .32 | .43 | -.43 | - |  |  |  |  | .51 |
| 22b | -.14* | .00* | .29 | -.27 | .02* | .29 | .36 | .21 | -.44 | -.15* | .23 | .34 | .22 | .35 | .21 | .20 | -.46 | .43 | .33 | -30 | .26 | - |  |  |  | .26* |
| 23d | .24 | .41 | -.11* | .02* | .01* | .01* | -.06* | -.08* | .06* | .45 | -.07* | -.05* | -.08* | -.17* | -.08* | -.02* | .06* | -.01* | -.03* | .15* | -.09* | -.13* | - |  |  | .05* |
| 24a | -.04* | .20 | .31 | -.31 | .50 | .31 | .19* | .64 | -.30 | .26 | .03* | .31 | .64 | .34 | .53 | .55 | -.13* | .36 | .55 | -.23 | .30 | .17* | .08* | - |  | .67 |
| 25c | -.13* | .15* | .15* | -.24 | .29 | .15* | .46 | .23 | -.46 | .06* | .13* | .15* | .27 | .42 | .54 | .42 | -.29 | .20 | .41 | -.32 | .36 | .24 | -.18* | .29 | - | .38 |

a. emotional problems items

b. conduct problems items

c. hyperactivity items

d. peer problems items

e. prosocial items

*Correlation below sufficient values

**correlation above sufficient values
